# Supplementary material
Source: PubMed Central journal article supplement (PMC3984539)
Supplement: NIHMS567385-supplement-01.pdf [file NIHMS567385-supplement-01.pdf]

## Supplemental Methods

### Fibrosis analysis

Image processing was conducted using Definiens Developer XD<sup>®</sup> object-oriented image analysis software. The process consisted of three steps: automated separation of tissue from glass/background, detection of whitespace within tissue and detection of SAB fibrosis (red) stain. Images were loaded into the software in Baccus native file format. Images were down-sampled to 2.5% and a Gaussian blur with a kernel size of 7x7 was applied. An automated and adaptive threshold was calculated and applied to the image, thereby segmenting the Tissue from the glass slide. The automatic threshold algorithm uses a combination of intensity histogram-based methods and a homogeneity measurement to calculate a threshold which divides the selected set of pixels into two subsets so that heterogeneity is increased to a maximum. The generated classification mask of the tissue region was then overlaid onto a 5x copy of the image. The auto-adaptive threshold was then applied in a 2 stage approach. First, a threshold was calculated for the set of pixels within the tissue region only. The resulting segmentation separated the high intensity, homogeneous whitespace regions from the tissue body. A second threshold was then calculated using the remaining set of pixels in the tissue, segmenting the SAB stain.

**Supplemental Table 1.** Characteristics of patients hospitalized for heart failure (HF) between January, 1986 and January, 2002 who subsequently did or did not have autopsy.

|                                       | <b>Autopsy</b> | <b>No Autopsy</b> | <b>p value</b> |
|---------------------------------------|----------------|-------------------|----------------|
| n                                     | 441            | 5999              |                |
| Age at HF admission                   | 72±15          | 73±13             | 0.21           |
| Male                                  | 57%            | 56%               | 0.69           |
| Creatinine at HF admission            | 1.5±1.0        | 1.6±1.0           | 0.52           |
| Hemoglobin at HF admission            | 12.2±2.2       | 12.1±2.1          | 0.38           |
| Hypertension                          | 59%            | 54%               | 0.04           |
| Coronary Disease                      | 65%            | 57%               | 0.002          |
| Diabetes                              | 32%            | 34%               | 0.38           |
| Atrial Fibrillation                   | 30%            | 33%               | 0.15           |
| Ejection fraction at time of HF event |                |                   | 0.57           |
| Ejection fraction <50%, n (%)         | 170 (39%)      | 2128 (37%)        |                |
| Ejection fraction ≥ 50%, n (%)        | 158 (36%)      | 2454 (40%)        |                |
| Ejection fraction not measured, n (%) | 113 (25%)      | 1417 (23%)        |                |

**Supplemental Table 2. Characteristics of HFpEF patients according to sex**

|                                               | <b>Female</b> | <b>Male</b> | <b>P value</b> |
|-----------------------------------------------|---------------|-------------|----------------|
| N                                             | 62            | 47          |                |
| Age at heart failure event, yrs               | 75±14         | 73±13       | 0.34           |
| Age at death, yrs                             | 78±14         | 75±12       | 0.22           |
| Hypertension (%)                              | 73%           | 81%         | 0.31           |
| Diabetes mellitus (%)                         | 37%           | 49%         | 0.22           |
| Clinical diagnosis of coronary disease        | 50%           | 76%         | 0.005          |
| Ejection fraction at heart failure event, %   | 60±8          | 57±9        | 0.08           |
| <b>Autopsy Findings</b>                       |               |             |                |
| Weight at autopsy, kg                         | 75±30         | 88±22       | 0.02           |
| Height at autopsy, cm                         | 161±8         | 173±9       | <0.001         |
| Body mass index at autopsy, kg/m <sup>2</sup> | 29±10         | 29±7        | 0.76           |
| Body surface area at autopsy, m <sup>2</sup>  | 1.80±0.36     | 2.04±0.27   | <0.001         |
| Heart weight at autopsy, g                    | 499±138       | 601±172     | 0.002          |
| Percent expected heart weight, %              | 182±45        | 174±59      | 0.46           |
| Gross left ventricular hypertrophy            | 65%           | 74%         | 0.26           |
| Gross right ventricular hypertrophy           | 44%           | 51%         | 0.44           |
| Gross infarct (old)                           | 31%           | 62%         | 0.001          |
| Gross fibrosis                                | 18%           | 19%         | 0.85           |
| Gross infarct (new)                           | 10%           | 13%         | 0.61           |
| Left ventricular dilatation                   | 37%           | 40%         | 0.72           |
| Right ventricular dilatation                  | 53%           | 43%         | 0.27           |
| Atrial dilatation                             | 55%           | 57%         | 0.79           |
| Microscopic fibrosis                          | 63%           | 49%         | 0.14           |
| Microscopic hypertrophy                       | 32%           | 30%         | 0.78           |
| Microscopic infarct                           | 11%           | 26%         | 0.053          |
| Coronary disease score                        | 10.0±3.7      | 12.5±3.2    | <0.001         |
| % Fibrosis (WFDM)                             | 12.4±9.6      | 13.0±7.7    | 0.77           |

Abbreviations: WFDM, whole-field digital microscopy
